# Supplementary material for: No Association between Glucocorticoid Diurnal Rhythm in Breastmilk and Infant Body Composition at 3 Months
Source: PubMed Central journal article supplement (PMC6835896; doi:10.3390/nu11102351), 2019-10-02
Supplement: nutrients-11-02351-s001.pdf [file nutrients-11-02351-s001.pdf]

| <b>Supplementary Table 1:</b> Cortisol and cortisone concentrations in breastmilk in 4-hour intervals. |                   |                    |
|--------------------------------------------------------------------------------------------------------|-------------------|--------------------|
|                                                                                                        | Cortisol (nmol/L) | Cortisone (nmol/L) |
| 0:00-4:00                                                                                              | 4.1±5.5           | 15.1±11.8          |
| 4:00-8:00                                                                                              | 11.6±8.7          | 29.7±12.8          |
| 8:00-12:00                                                                                             | 8.2±6.5           | 27.9±8.6           |
| 12:00-16:00                                                                                            | 4.4±2.9           | 21.3±6.8           |
| 16:00-20:00                                                                                            | 2.1±1.4           | 13.0±6.1           |
| 20:00-24:00                                                                                            | 2.1±3.9           | 10.4±9.2           |
| Values represent mean±SD                                                                               |                   |                    |
